# Supplementary material
Source: PubMed Central journal article supplement (PMC8213057)
Supplement: jm0c00395_si_001.pdf [file jm0c00395_si_001.pdf]

# Targeting ALK2: An Open Science Approach to Developing Therapeutics for the Treatment of Diffuse Intrinsic Pontine Glioma

*Deeba Ensan,<sup>†,§</sup> David Smil,<sup>§</sup> Carlos A. Zepeda-Velázquez,<sup>§</sup> Dimitrios Panagopoulos,<sup>§,⊖,×</sup>  
Jong Fu Wong,<sup>‡</sup> Eleanor P. Williams,<sup>‡</sup> Roslin Adamson,<sup>‡</sup> Alex N. Bullock,<sup>‡</sup> Taira Kiyota,<sup>§</sup>  
Ahmed Aman,<sup>§,ζ</sup> Owen G. Roberts,<sup>¶</sup> Aled M. Edwards,<sup>¶,⊖</sup> Jeff A. O'Meara,<sup>§,§</sup> Methvin B.  
Isaac,<sup>§</sup> Rima Al-awar\*<sup>§,†</sup>*

<sup>†</sup> Department of Pharmacology and Toxicology, University of Toronto, Medical Sciences Building, Room 4207, 1 King's College Circle, Toronto, Ontario M5S 1A8, Canada

<sup>§</sup> Drug Discovery Program, Ontario Institute for Cancer Research, 661 University Avenue, MaRS Centre, West Tower, Toronto, Ontario M5G 0A3, Canada

<sup>⊖</sup> Structural Genomics Consortium, University of Toronto, 101 College Street, MaRS Centre, South Tower, Toronto, Ontario M5G 1L7, Canada

<sup>×</sup> Department of Chemistry, Simon Fraser University, 8888 University Drive, Burnaby, British Columbia V5A 1S6, Canada

<sup>‡</sup> Structural Genomics Consortium, University of Oxford, Old Road Campus, Roosevelt Drive, Oxford OX3 7DQ, United Kingdom

<sup>ζ</sup> Leslie Dan Faculty of Pharmacy, University of Toronto, 144 College Street, Toronto, Ontario M5S 3M2, Canada

<sup>¶</sup> M4K Pharma Inc., 101 College Street, MaRS Centre, South Tower, Toronto, Ontario M5G 1L7, Canada

## - Supporting Information -

|                         |    |
|-------------------------|----|
| 1. NMR Spectra          | S2 |
| 2. Supplementary Tables | S8 |

# 1. NMR Spectra

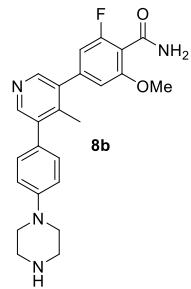

<sup>1</sup>H NMR (500 MHz, DMSO)

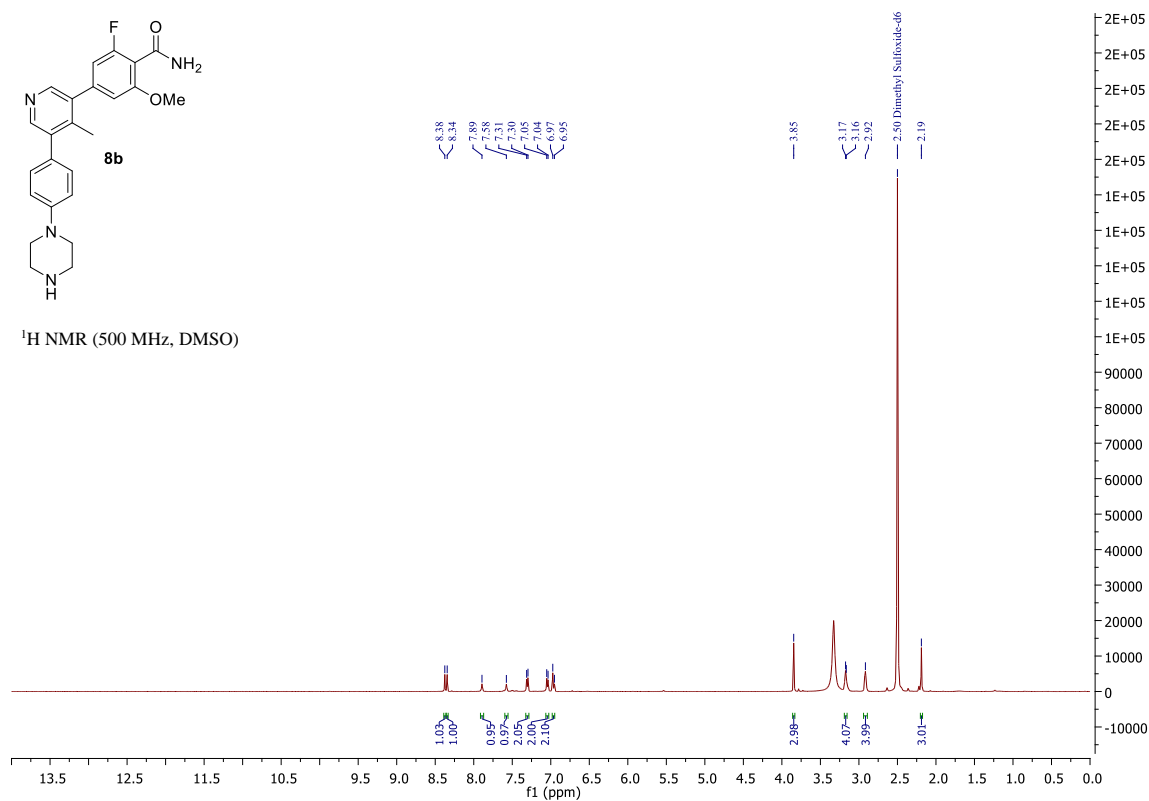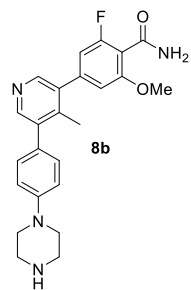

<sup>19</sup>F NMR (471 MHz, DMSO)

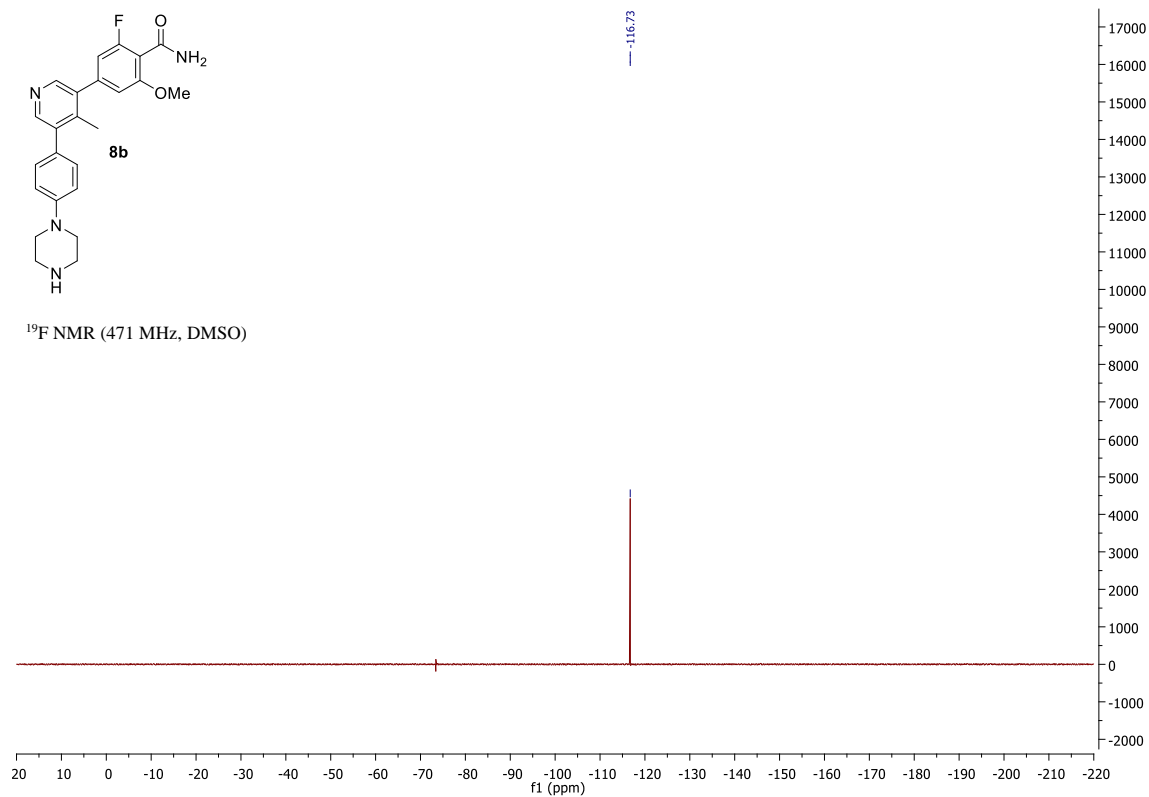

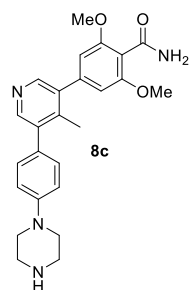

<sup>1</sup>H NMR (500 MHz, DMSO)

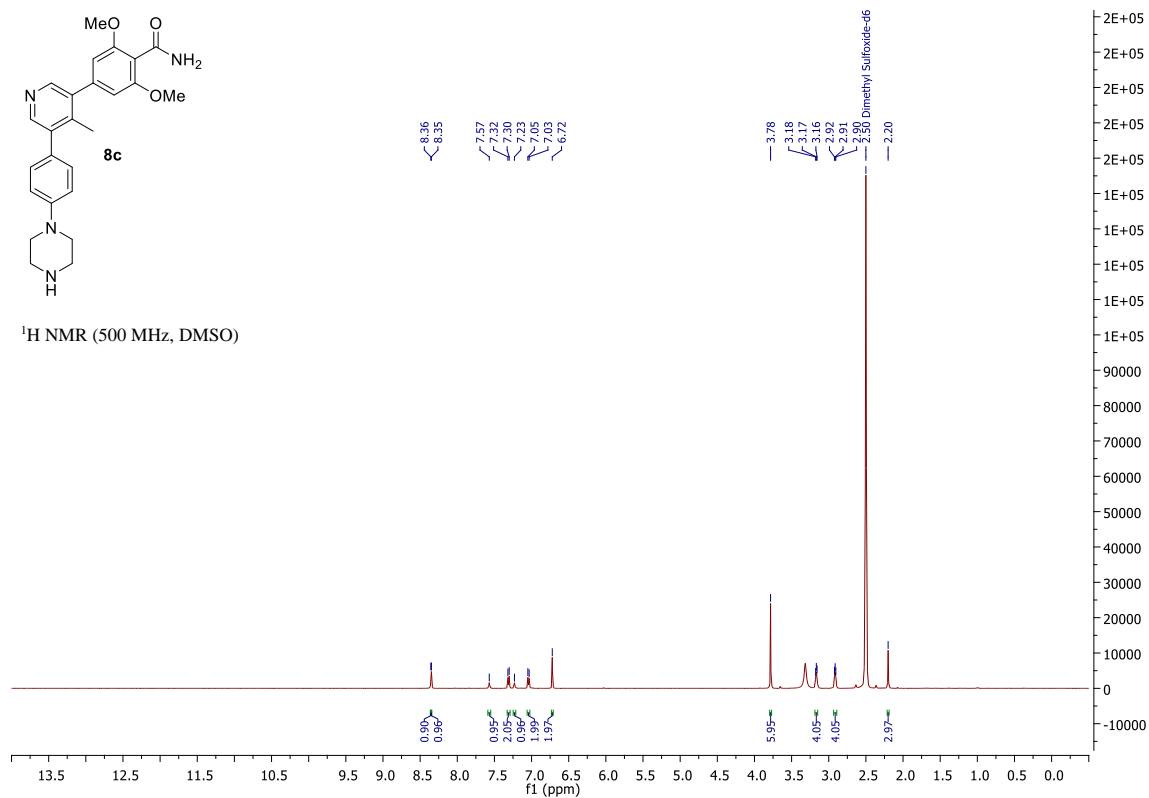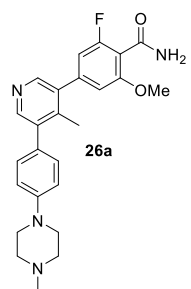

<sup>1</sup>H NMR (500 MHz, DMSO)

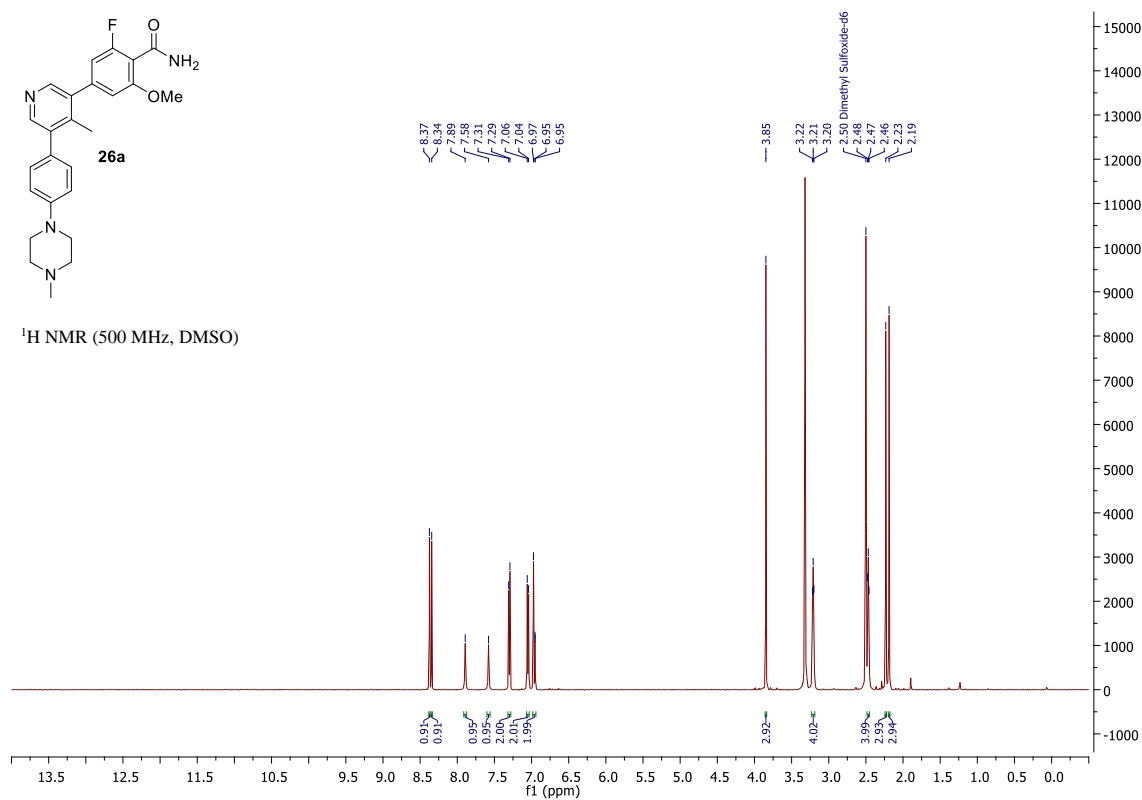

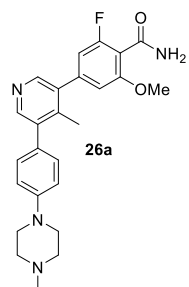

<sup>19</sup>F NMR (471 MHz, DMSO)

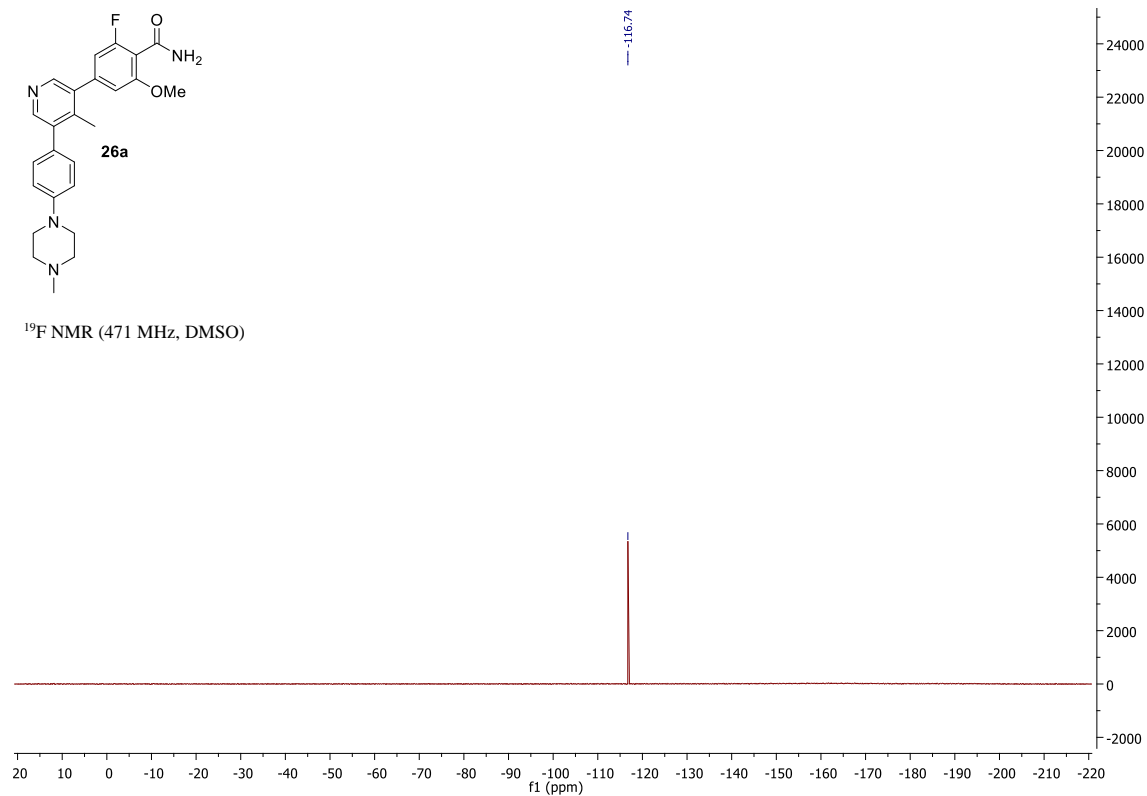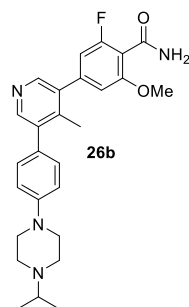

<sup>1</sup>H NMR (500 MHz, DMSO)

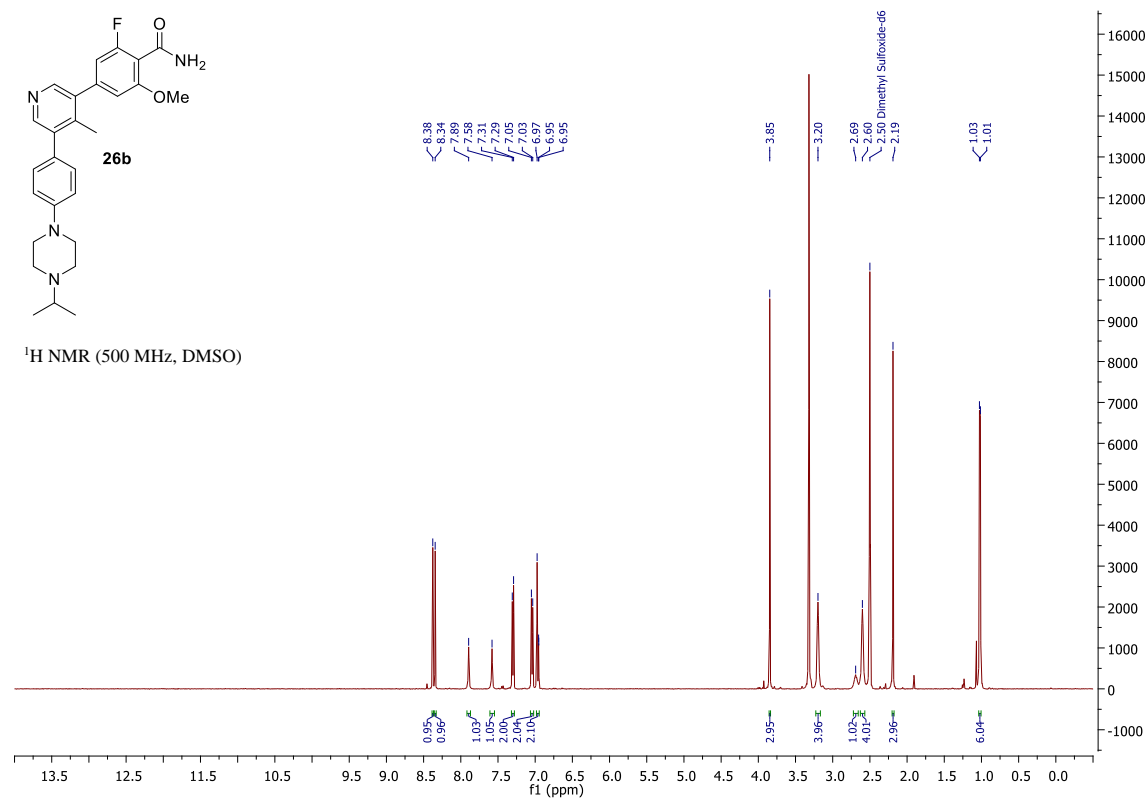

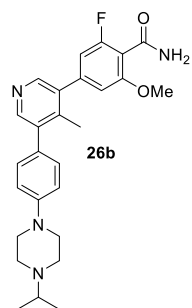

$^{19}\text{F}$  NMR (471 MHz, DMSO)

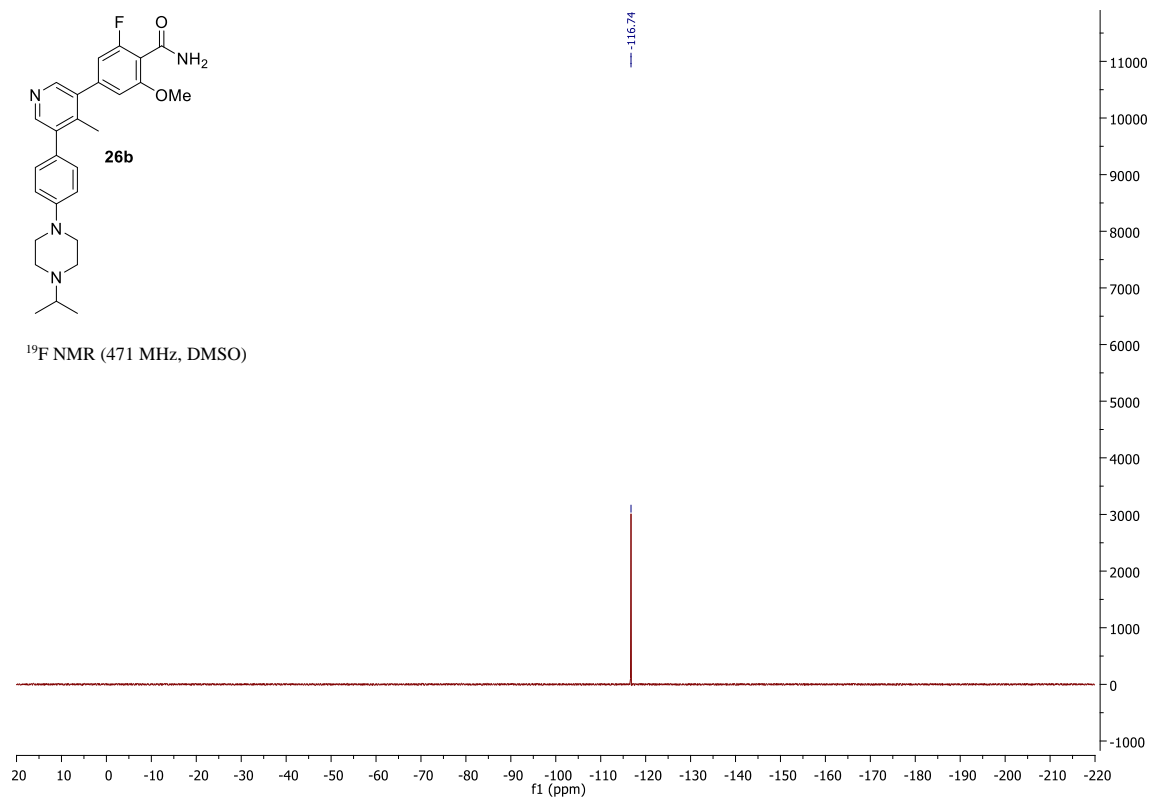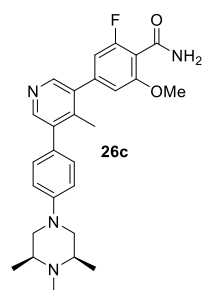

$^1\text{H}$  NMR (500 MHz,  $\text{CDCl}_3$ )

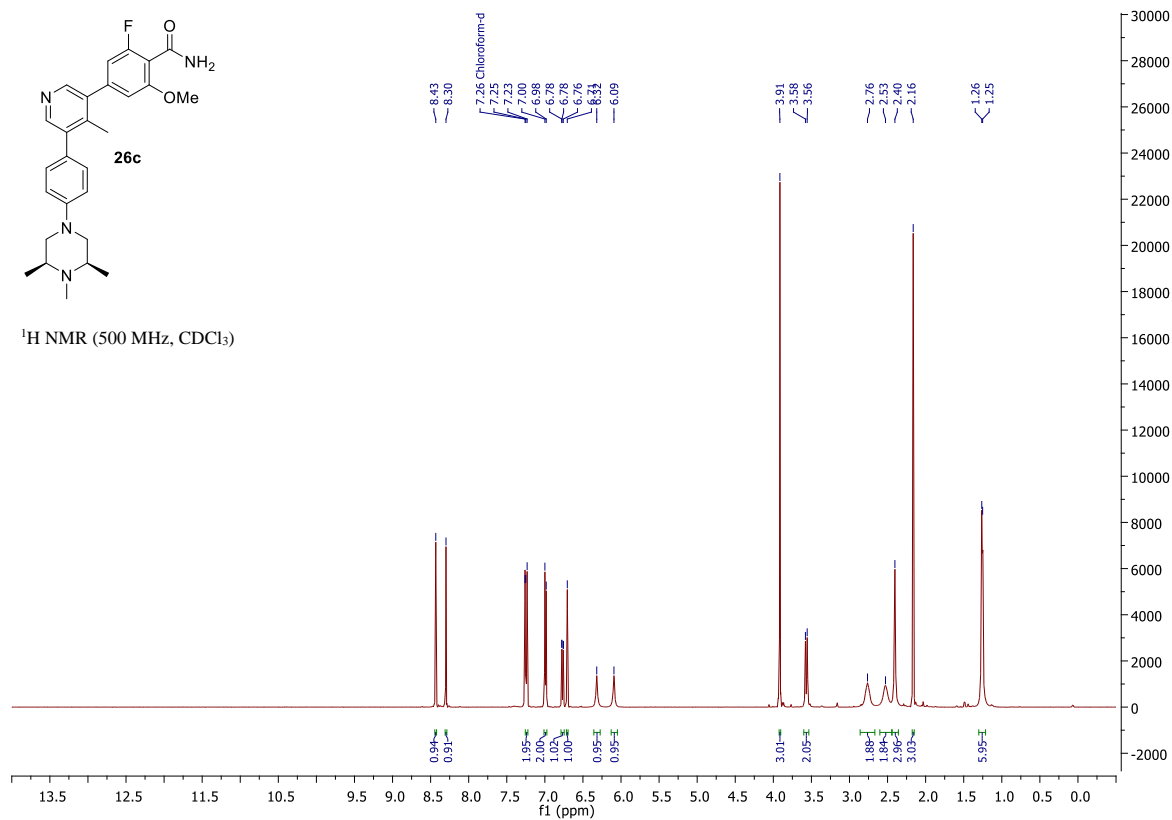

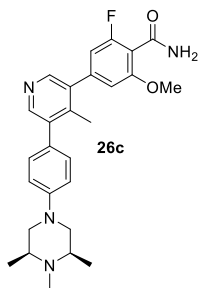

$^{19}\text{F}$  NMR (471 MHz, MeOD)

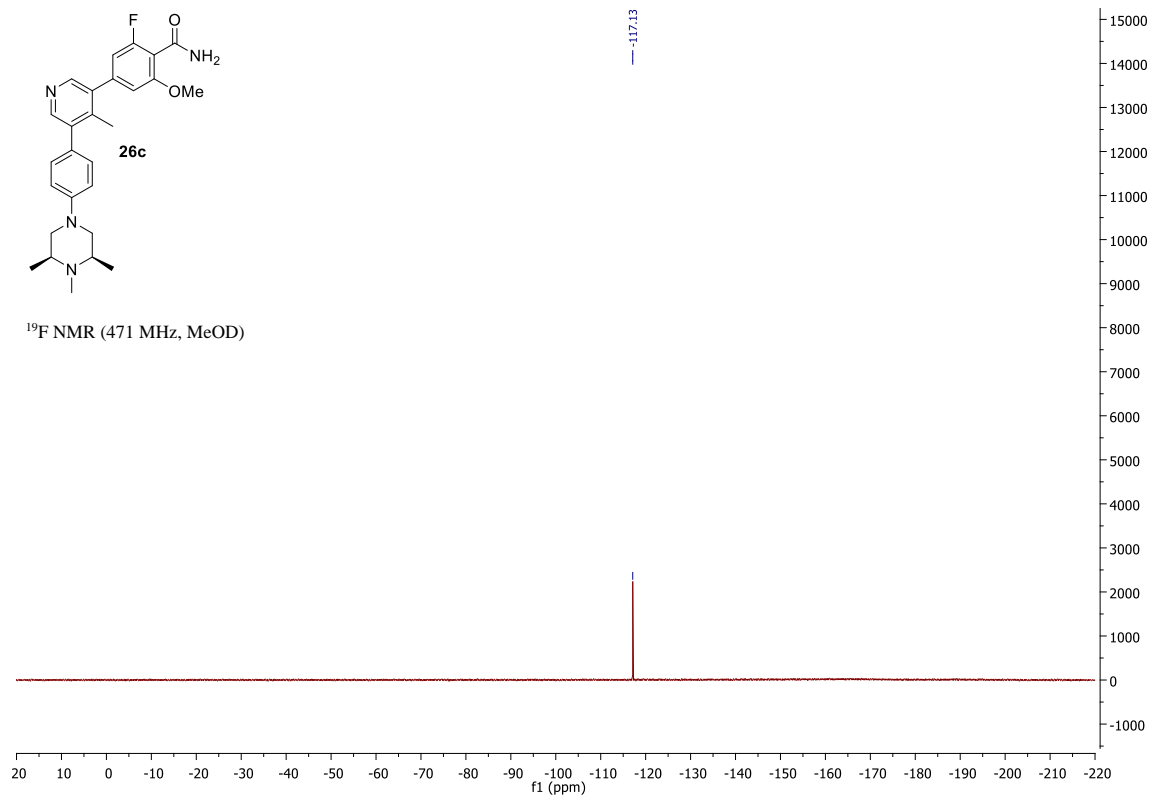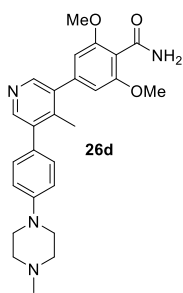

$^1\text{H}$  NMR (500 MHz, DMSO)

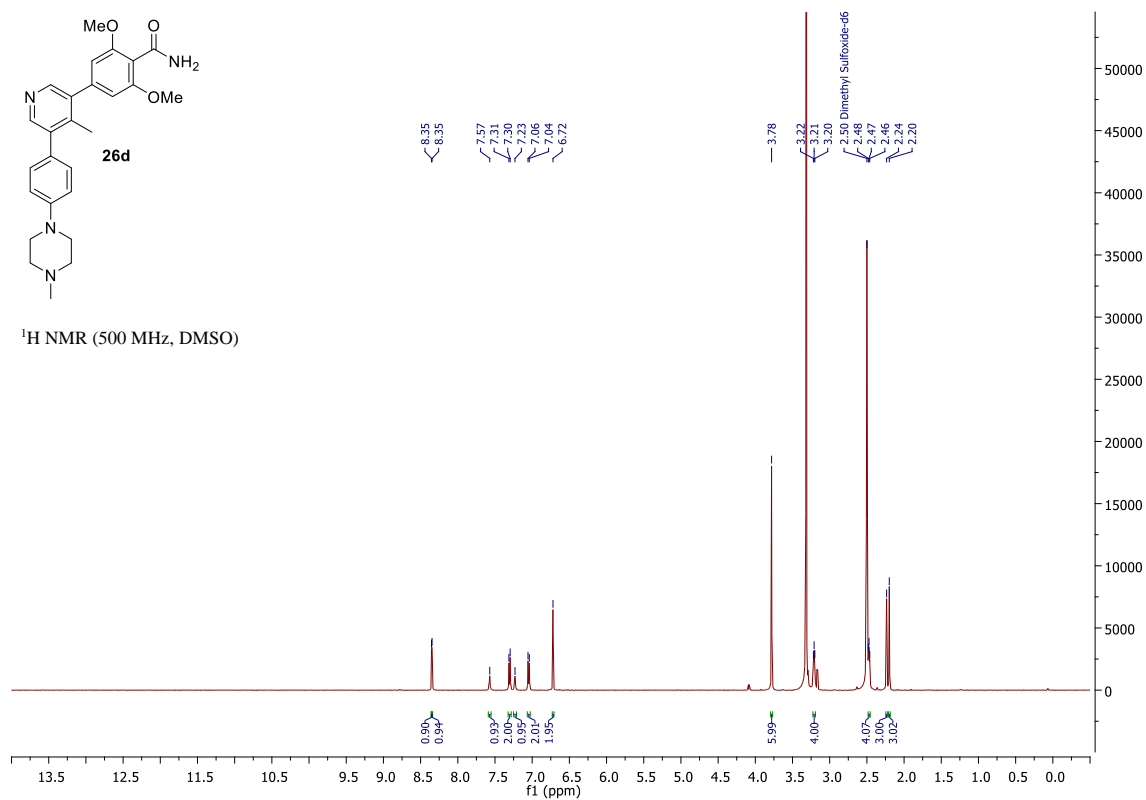

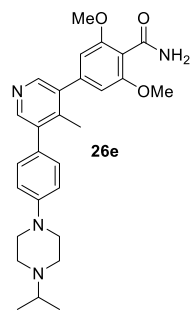

<sup>1</sup>H NMR (500 MHz, MeOD)

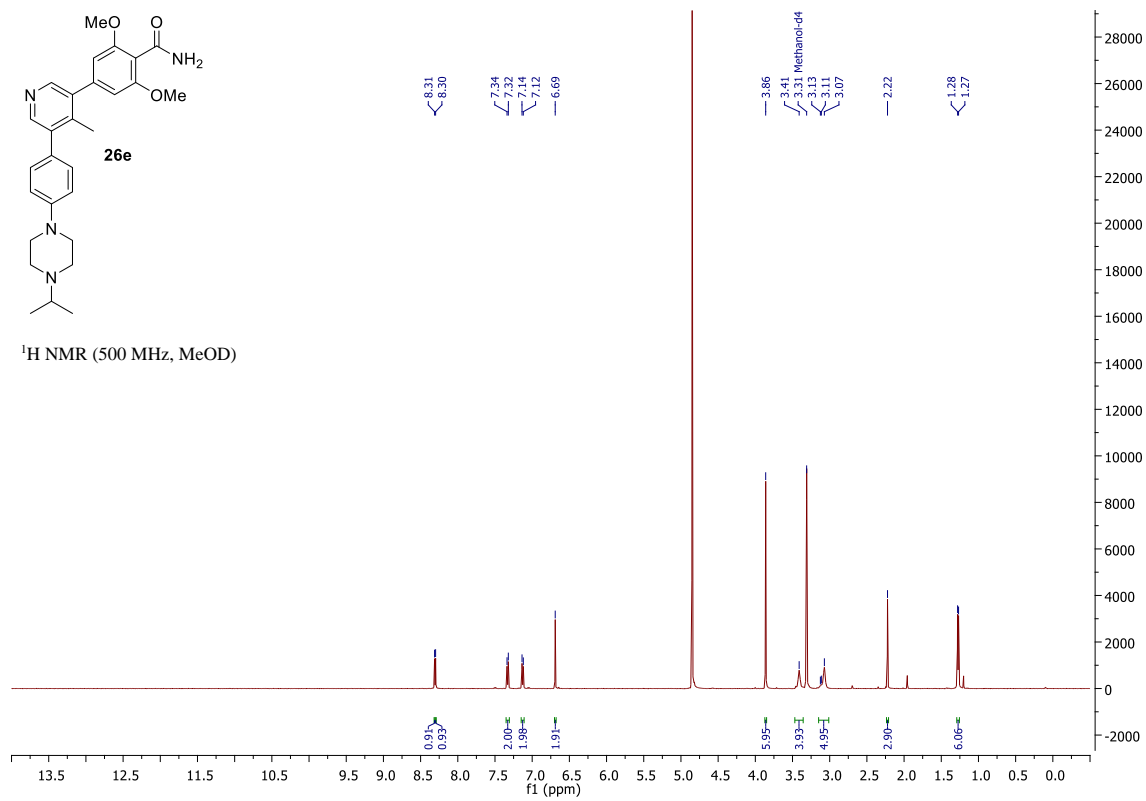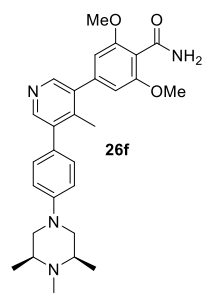

<sup>1</sup>H NMR (500 MHz, MeOD)

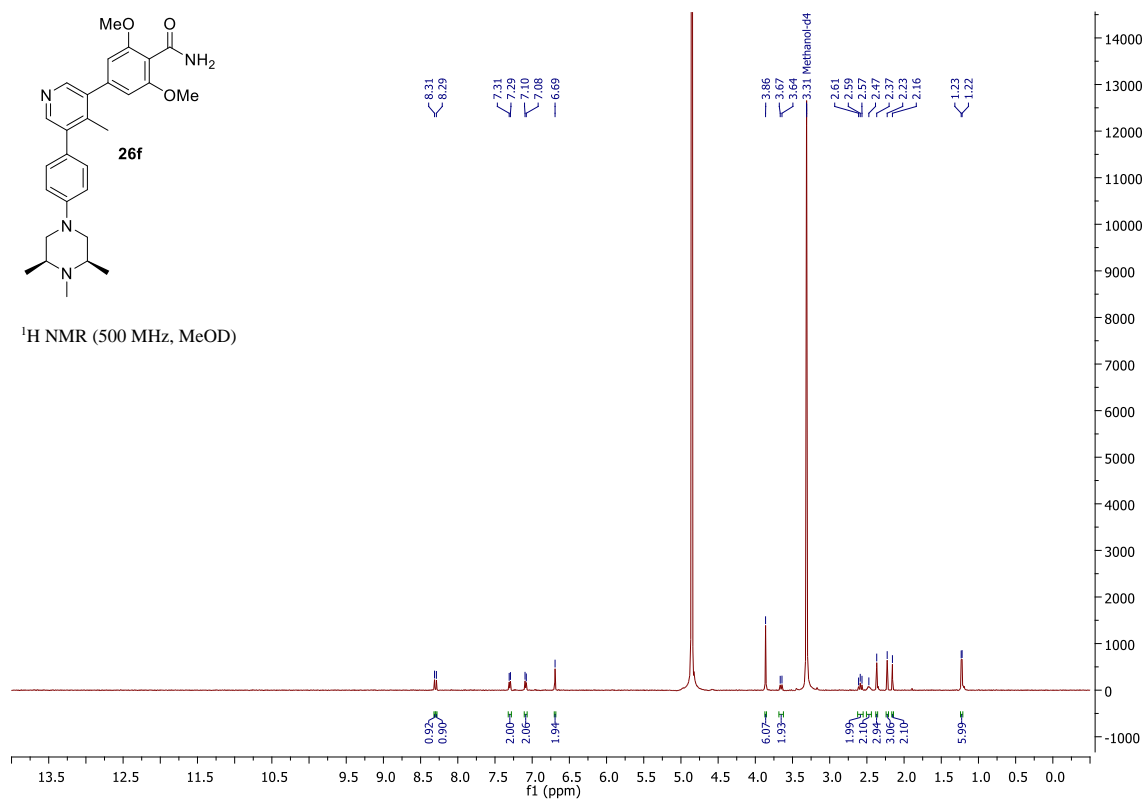

## 2. Supplementary Tables

### Co-Crystallization of ALK2 with M4K2149: Phasing, Model Building, Refinement, and Validation

**Table 1. Data collection and refinement statistics.**

|                                                | <b>ACVR1A with<br/>M4K2149</b> |
|------------------------------------------------|--------------------------------|
| <b>Wavelength (Å...)</b>                       | 0.9763                         |
| <b>Resolution range (Å...)</b>                 | 78.45 - 2.56 (2.65 - 2.56)     |
| <b>Space group</b>                             | C 1 2 1                        |
| <b>a, b, c (Å)</b>                             | 198.0, 101.8, 84.4             |
| <b><math>\alpha, \beta, \gamma</math>, (°)</b> | 90.0, 111.4, 90.0              |
| <b>Total reflections</b>                       | 671529 (49767)                 |
| <b>Unique reflections</b>                      | 50340 (3699)                   |
| <b>Multiplicity</b>                            | 13.3 (13.5)                    |
| <b>Completeness (%)</b>                        | 100.0 (100.0)                  |
| <b>Mean I/sigma(I)</b>                         | 8.8 (1.3)                      |
| <b>Wilson B-factor (Å<sup>2</sup>)</b>         | 58.84                          |
| <b>R-merge</b>                                 | 0.197 (3.197)                  |
| <b>CC (1/2)</b>                                | 0.998 (0.870)                  |
| <b>Reflections used for Refinement</b>         | 50137                          |
| <b>R-work</b>                                  | 0.2242                         |
| <b>R-free</b>                                  | 0.2717                         |
| <b>Number of non-hydrogen atoms</b>            | 9146                           |
| <b>macromolecules</b>                          | 8941                           |
| <b>ligands</b>                                 | 175                            |
| <b>water</b>                                   | 30                             |
| <b>Protein residues</b>                        | 1152                           |
| <b>RMS(bonds) (Å)</b>                          | 0.002                          |
| <b>RMS(angles) (°)</b>                         | 0.47                           |
| <b>Ramachandran favored (%)</b>                | 96.21                          |
| <b>Ramachandran allowed (%)</b>                | 3.79                           |
| <b>Ramachandran outliers (%)</b>               | 0                              |



|                                         |       |
|-----------------------------------------|-------|
| <b>Clashscore</b>                       | 17.96 |
| <b>Average B-factor (Å<sup>2</sup>)</b> | 73.66 |
| <b>macromolecules</b>                   | 73.67 |
| <b>ligands</b>                          | 75.18 |
| <b>solvent</b>                          | 62.39 |

Statistics for the highest-resolution shell are shown in parentheses

**Table 2: Caco-2 permeability of 2,6-dimethoxybenzamide analogs**

| Compound                                         | 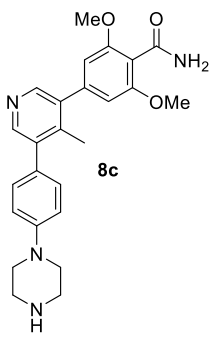 |  |  |  |
|--------------------------------------------------|-----------------------------------------------------------------------------------|-----------------------------------------------------------------------------------|------------------------------------------------------------------------------------|-------------------------------------------------------------------------------------|
| <b>P<sub>app_AB</sub> (10<sup>-6</sup> cm/s)</b> | 0.1                                                                               | 0.7                                                                               | 0.9                                                                                | 0.7                                                                                 |
| <b>P<sub>app_BA</sub> (10<sup>-6</sup> cm/s)</b> | 6.1                                                                               | 13.9                                                                              | 14.4                                                                               | 12.6                                                                                |
| <b>Efflux Ratio</b>                              | >10                                                                               | >10                                                                               | >10                                                                                | >10                                                                                 |

**Table 3: HLM and MLM stability of lead amides**

| Compound                     | 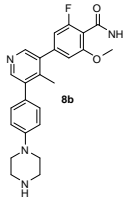 |  |  |  |  |  |  |  |
|------------------------------|-------------------------------------------------------------------------------------|-------------------------------------------------------------------------------------|-------------------------------------------------------------------------------------|-------------------------------------------------------------------------------------|-------------------------------------------------------------------------------------|--------------------------------------------------------------------------------------|---------------------------------------------------------------------------------------|---------------------------------------------------------------------------------------|
| <b>MLM % Remaining at 1h</b> | 98.4                                                                                | 54.6                                                                                | 86.2                                                                                | 48.7                                                                                | 99.8                                                                                | 85.2                                                                                 | 99.5                                                                                  | 57.5                                                                                  |
| <b>HLM % Remaining at 1h</b> | 104.6                                                                               | 78.0                                                                                | 91.9                                                                                | 47.5                                                                                | 88.8                                                                                | 81.4                                                                                 | 98.0                                                                                  | 55.7                                                                                  |

**Table 4: Off-target activity of 2-fluoro-6-methoxybenzamide analogs (26a-c); CYP and hERG inhibition**

| Compound            | 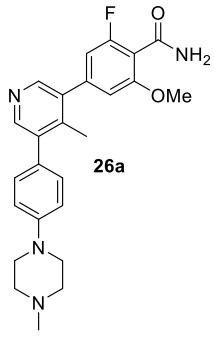 26a |  26b |  26c |
|---------------------|---------------------------------------------------------------------------------------|----------------------------------------------------------------------------------------|-----------------------------------------------------------------------------------------|
| CYP1A2              | >50                                                                                   | >50                                                                                    | >50                                                                                     |
| CYP2B6              | >50                                                                                   | >50                                                                                    | >50                                                                                     |
| CYP2C8              | >50                                                                                   | >50                                                                                    | >50                                                                                     |
| CYP2C9              | >50                                                                                   | >50                                                                                    | >50                                                                                     |
| CYP2C19             | >50                                                                                   | >50                                                                                    | >50                                                                                     |
| CYP2D6              | >50                                                                                   | >50                                                                                    | >50                                                                                     |
| CYP3A4-Midazolam    | >50                                                                                   | >50                                                                                    | >50                                                                                     |
| CYP3A4-Testosterone | >50                                                                                   | >50                                                                                    | >50                                                                                     |
| hERG                | >30                                                                                   | >30                                                                                    | 18.8                                                                                    |

**Table 5: 375-member kinase selectivity panel: % enzyme activity at 1  $\mu$ M**

| Kinase   | 26b    |       | 26a    |        | 26c    |        |
|----------|--------|-------|--------|--------|--------|--------|
|          | Run 1  | Run 2 | Run 1  | Run 2  | Run 1  | Run 2  |
| ABL1     | 84.48  | 80.78 | 75.19  | 75.12  | 83.92  | 82.07  |
| ABL2/ARG | 98.76  | 98.48 | 97.35  | 95.77  | 97.10  | 96.59  |
| ACK1     | 66.77  | 61.59 | 65.49  | 65.46  | 79.52  | 76.07  |
| AKT1     | 101.90 | 99.01 | 105.74 | 102.39 | 105.40 | 104.50 |
| AKT2     | 94.01  | 93.58 | 91.93  | 91.70  | 93.01  | 92.08  |

|                    |        |        |        |        |        |        |
|--------------------|--------|--------|--------|--------|--------|--------|
| <b>AKT3</b>        | 98.54  | 97.15  | 94.96  | 94.73  | 98.68  | 98.56  |
| <b>ALK</b>         | 103.35 | 102.24 | 99.92  | 99.31  | 100.77 | 96.51  |
| <b>ALK1/ACVRL1</b> | 2.90   | 2.55   | 2.93   | 2.65   | 4.67   | 4.38   |
| <b>ALK2/ACVR1</b>  | 7.69   | 5.67   | 9.92   | 8.63   | 13.70  | 11.70  |
| <b>ALK3/BMPR1A</b> | 39.92  | 39.34  | 40.21  | 38.35  | 50.46  | 49.95  |
| <b>ALK4/ACVR1B</b> | 81.34  | 79.81  | 68.83  | 68.79  | 82.37  | 81.71  |
| <b>ALK5/TGFBR1</b> | 84.09  | 83.42  | 82.46  | 82.28  | 97.24  | 96.60  |
| <b>ALK6/BMPR1B</b> | 27.92  | 27.02  | 18.19  | 17.03  | 30.16  | 30.06  |
| <b>ARAF</b>        | 52.62  | 51.73  | 29.31  | 28.83  | 48.15  | 43.32  |
| <b>ARK5/NUAK1</b>  | 92.50  | 92.31  | 97.59  | 90.26  | 96.00  | 93.75  |
| <b>ASK1/MAP3K5</b> | 101.03 | 99.17  | 95.53  | 94.20  | 97.79  | 96.09  |
| <b>Aurora A</b>    | 93.85  | 91.68  | 100.62 | 97.24  | 102.45 | 101.37 |
| <b>AURORA B</b>    | 112.26 | 110.21 | 102.08 | 100.58 | 105.03 | 104.62 |
| <b>Aurora C</b>    | 100.58 | 98.40  | 105.38 | 103.00 | 100.02 | 99.34  |
| <b>AXL</b>         | 81.11  | 81.04  | 81.85  | 81.59  | 91.27  | 86.95  |
| <b>BLK</b>         | 101.20 | 100.60 | 97.21  | 95.94  | 103.82 | 102.50 |
| <b>BMPR2</b>       | 94.33  | 94.05  | 89.10  | 88.40  | 103.72 | 100.11 |
| <b>BMX/ETK</b>     | 102.78 | 102.35 | 103.19 | 102.04 | 101.61 | 100.72 |
| <b>BRAF</b>        | 44.45  | 44.03  | 28.84  | 28.77  | 41.09  | 40.52  |
| <b>BRK</b>         | 65.32  | 64.33  | 58.34  | 58.28  | 73.93  | 73.52  |
| <b>BRSK1</b>       | 87.89  | 84.48  | 84.66  | 83.89  | 83.95  | 78.18  |
| <b>BRSK2</b>       | 73.81  | 71.41  | 61.34  | 60.95  | 77.89  | 76.84  |
| <b>BTK</b>         | 97.71  | 97.62  | 95.31  | 94.35  | 96.55  | 94.07  |
| <b>c-Kit</b>       | 80.81  | 76.90  | 74.10  | 74.03  | 75.75  | 74.89  |
| <b>c-MER</b>       | 96.98  | 95.70  | 100.00 | 99.93  | 101.13 | 96.34  |
| <b>c-MET</b>       | 98.44  | 98.41  | 100.40 | 98.28  | 107.02 | 106.76 |
| <b>c-Src</b>       | 98.33  | 98.08  | 96.63  | 96.22  | 100.08 | 97.10  |
| <b>CAMK1a</b>      | 94.69  | 91.83  | 94.86  | 92.25  | 97.52  | 96.82  |
| <b>CAMK1b</b>      | 100.78 | 99.74  | 97.89  | 95.63  | 99.36  | 99.02  |
| <b>CAMK1d</b>      | 100.93 | 98.72  | 98.48  | 98.20  | 99.93  | 97.72  |
| <b>CAMK1g</b>      | 98.99  | 97.85  | 102.44 | 99.10  | 107.90 | 107.66 |
| <b>CAMK2a</b>      | 89.93  | 89.17  | 85.47  | 83.69  | 96.65  | 93.72  |
| <b>CAMK2b</b>      | 89.04  | 86.76  | 83.94  | 83.40  | 92.83  | 91.32  |
| <b>CAMK2d</b>      | 93.56  | 93.45  | 95.08  | 94.73  | 96.21  | 95.15  |
| <b>CAMK2g</b>      | 96.32  | 96.27  | 102.51 | 100.65 | 109.89 | 107.66 |
| <b>CAMK4</b>       | 103.80 | 101.77 | 100.25 | 98.68  | 103.35 | 100.90 |
| <b>CAMKK1</b>      | 92.70  | 88.83  | 94.66  | 92.05  | 94.05  | 93.52  |
| <b>CAMKK2</b>      | 79.40  | 79.29  | 71.74  | 70.52  | 76.42  | 75.78  |
| <b>CDC7/DBF4</b>   | 98.14  | 94.08  | 92.20  | 91.84  | 94.17  | 93.55  |

|                                 |        |        |        |        |        |        |
|---------------------------------|--------|--------|--------|--------|--------|--------|
| <b>CDK1/cyclin A</b>            | 84.48  | 83.71  | 94.73  | 92.50  | 90.77  | 89.52  |
| <b>CDK1/cyclin B</b>            | 90.35  | 89.90  | 95.67  | 92.35  | 94.04  | 91.98  |
| <b>CDK1/cyclin E</b>            | 100.40 | 99.30  | 98.29  | 97.19  | 92.40  | 91.92  |
| <b>CDK14/cyclin Y (PFTK1)</b>   | 97.79  | 97.41  | 98.41  | 98.24  | 99.84  | 99.61  |
| <b>CDK16/cyclin Y (PCTAIRE)</b> | 93.46  | 91.35  | 93.35  | 92.85  | 92.26  | 91.60  |
| <b>CDK17/cyclin Y (PCTK2)</b>   | 94.88  | 93.99  | 96.13  | 95.45  | 100.57 | 99.91  |
| <b>CDK18/cyclin Y (PCTK3)</b>   | 101.52 | 100.66 | 102.15 | 100.43 | 99.05  | 97.60  |
| <b>CDK19/cyclin C</b>           | 82.42  | 82.07  | 79.08  | 77.81  | 87.08  | 85.09  |
| <b>CDK2/cyclin A</b>            | 92.33  | 92.29  | 99.96  | 97.95  | 99.98  | 98.65  |
| <b>CDK2/Cyclin A1</b>           | 111.93 | 111.68 | 99.92  | 99.67  | 98.22  | 97.14  |
| <b>CDK2/cyclin E</b>            | 106.40 | 104.69 | 104.56 | 104.52 | 102.22 | 102.10 |
| <b>CDK2/cyclin E2</b>           | 104.97 | 104.46 | 108.37 | 104.96 | 95.00  | 93.14  |
| <b>CDK2/cyclin O</b>            | 92.35  | 92.30  | 95.09  | 93.78  | 92.72  | 88.53  |
| <b>CDK3/cyclin E</b>            | 85.83  | 85.35  | 82.66  | 81.63  | 78.70  | 78.38  |
| <b>CDK3/cyclin E2</b>           | 85.07  | 84.43  | 89.55  | 88.05  | 86.16  | 83.94  |
| <b>CDK4/cyclin D1</b>           | 100.09 | 99.89  | 99.36  | 98.46  | 100.47 | 100.29 |
| <b>CDK4/cyclin D3</b>           | 93.74  | 93.67  | 100.73 | 96.96  | 96.05  | 95.54  |
| <b>CDK5/P25</b>                 | 93.58  | 93.23  | 94.60  | 91.77  | 94.85  | 94.09  |
| <b>CDK5/p35</b>                 | 95.63  | 95.08  | 96.22  | 95.26  | 97.61  | 96.90  |
| <b>CDK6/cyclin D1</b>           | 101.19 | 100.82 | 100.38 | 97.80  | 95.90  | 92.80  |
| <b>CDK6/cyclin D3</b>           | 89.55  | 88.85  | 86.29  | 86.25  | 103.38 | 102.19 |
| <b>CDK7/cyclin H</b>            | 103.42 | 101.47 | 97.01  | 93.27  | 96.12  | 95.50  |
| <b>CDK8/cyclin C</b>            | 90.11  | 89.57  | 84.60  | 83.64  | 93.06  | 92.05  |
| <b>CDK9/cyclin K</b>            | 105.53 | 104.69 | 97.53  | 96.95  | 105.74 | 102.30 |
| <b>CDK9/cyclin T1</b>           | 93.52  | 92.35  | 90.84  | 90.82  | 97.07  | 96.85  |
| <b>CDK9/cyclin T2</b>           | 102.05 | 102.02 | 100.00 | 99.00  | 101.72 | 100.35 |
| <b>CHK1</b>                     | 106.02 | 105.34 | 98.22  | 94.26  | 116.91 | 100.95 |
| <b>CHK2</b>                     | 95.42  | 95.41  | 99.69  | 99.41  | 102.33 | 101.19 |
| <b>CK1a1</b>                    | 99.28  | 99.26  | 96.07  | 91.31  | 100.33 | 99.44  |
| <b>CK1a1L</b>                   | 103.89 | 102.82 | 98.38  | 97.55  | 99.41  | 99.15  |
| <b>CK1d</b>                     | 100.50 | 99.03  | 98.06  | 94.27  | 108.24 | 108.05 |
| <b>CK1epsilon</b>               | 95.99  | 91.70  | 93.82  | 93.07  | 94.74  | 90.08  |
| <b>CK1g1</b>                    | 61.14  | 60.03  | 57.68  | 55.41  | 71.74  | 69.61  |
| <b>CK1g2</b>                    | 73.25  | 70.17  | 77.96  | 75.72  | 86.97  | 85.61  |
| <b>CK1G3</b>                    | 71.45  | 69.81  | 65.92  | 64.87  | 78.82  | 77.64  |
| <b>CK2a</b>                     | 88.72  | 85.73  | 92.50  | 91.32  | 87.19  | 86.32  |
| <b>CK2a2</b>                    | 98.13  | 91.24  | 95.26  | 92.27  | 101.45 | 98.98  |

|                     |        |        |        |        |        |        |
|---------------------|--------|--------|--------|--------|--------|--------|
| <b>CLK1</b>         | 93.61  | 92.82  | 97.84  | 94.42  | 88.03  | 86.91  |
| <b>CLK2</b>         | 88.31  | 87.08  | 91.72  | 91.71  | 90.33  | 85.73  |
| <b>CLK3</b>         | 92.75  | 91.99  | 103.06 | 99.59  | 88.26  | 86.89  |
| <b>CLK4</b>         | 94.89  | 93.34  | 88.92  | 85.58  | 92.56  | 91.14  |
| <b>COT1/MAP3K8</b>  | 94.82  | 93.40  | 90.60  | 88.67  | 93.89  | 92.86  |
| <b>CSK</b>          | 94.12  | 92.13  | 99.55  | 99.36  | 103.67 | 102.04 |
| <b>CTK/MATK</b>     | 95.25  | 94.38  | 95.23  | 94.85  | 99.24  | 98.62  |
| <b>DAPK1</b>        | 98.50  | 98.30  | 95.66  | 94.56  | 98.78  | 96.25  |
| <b>DAPK2</b>        | 104.25 | 103.70 | 103.30 | 101.48 | 100.40 | 95.98  |
| <b>DCAMKL1</b>      | 84.74  | 83.59  | 81.84  | 81.46  | 89.11  | 85.85  |
| <b>DCAMKL2</b>      | 70.71  | 69.99  | 64.44  | 62.07  | 84.54  | 82.24  |
| <b>DDR1</b>         | 40.20  | 39.34  | 32.12  | 31.23  | 57.22  | 55.50  |
| <b>DDR2</b>         | 92.60  | 91.94  | 100.02 | 96.68  | 92.70  | 92.27  |
| <b>DLK/MAP3K12</b>  | 94.50  | 94.38  | 93.71  | 91.76  | 99.18  | 97.93  |
| <b>DMPK</b>         | 111.79 | 110.69 | 108.78 | 108.75 | 105.34 | 99.12  |
| <b>DMPK2</b>        | 87.02  | 85.28  | 83.84  | 82.52  | 87.55  | 86.97  |
| <b>DRAK1/STK17A</b> | 97.03  | 96.54  | 96.37  | 95.60  | 96.60  | 95.69  |
| <b>DYRK1/DYRK1A</b> | 57.20  | 56.39  | 43.26  | 43.07  | 62.42  | 60.05  |
| <b>DYRK1B</b>       | 53.64  | 52.79  | 40.65  | 39.80  | 59.24  | 58.52  |
| <b>DYRK2</b>        | 97.52  | 95.78  | 96.34  | 95.06  | 100.45 | 98.44  |
| <b>DYRK3</b>        | 93.39  | 92.56  | 90.42  | 88.30  | 96.03  | 96.01  |
| <b>DYRK4</b>        | 97.15  | 96.54  | 102.84 | 102.49 | 101.22 | 100.24 |
| <b>EGFR</b>         | 101.33 | 101.05 | 96.02  | 95.66  | 95.30  | 93.91  |
| <b>EPHA1</b>        | 97.99  | 97.40  | 97.49  | 96.36  | 93.32  | 89.93  |
| <b>EPHA2</b>        | 102.33 | 98.97  | 102.55 | 97.38  | 108.18 | 104.56 |
| <b>EPHA3</b>        | 101.11 | 100.47 | 95.66  | 94.70  | 101.16 | 98.11  |
| <b>EPHA4</b>        | 101.47 | 99.89  | 95.31  | 91.81  | 99.30  | 98.76  |
| <b>EPHA5</b>        | 94.67  | 94.61  | 92.21  | 90.37  | 92.65  | 90.66  |
| <b>EPHA6</b>        | 103.23 | 101.59 | 104.89 | 103.54 | 105.77 | 103.73 |
| <b>EPHA7</b>        | 102.78 | 102.43 | 100.53 | 98.85  | 98.39  | 98.36  |
| <b>EPHA8</b>        | 102.03 | 95.79  | 95.26  | 94.54  | 97.48  | 97.01  |
| <b>EPHB1</b>        | 91.48  | 91.06  | 95.49  | 91.99  | 92.59  | 89.37  |
| <b>EPHB2</b>        | 96.21  | 95.97  | 93.91  | 92.89  | 98.85  | 97.40  |
| <b>EPHB3</b>        | 94.79  | 92.25  | 95.50  | 95.16  | 98.92  | 96.08  |
| <b>EPHB4</b>        | 91.05  | 85.87  | 94.68  | 93.42  | 91.55  | 91.07  |
| <b>ERBB2/HER2</b>   | 87.21  | 85.10  | 89.74  | 89.07  | 96.83  | 95.40  |
| <b>ERBB4/HER4</b>   | 100.83 | 100.25 | 99.50  | 99.40  | 94.94  | 93.88  |
| <b>ERK1</b>         | 98.69  | 97.39  | 97.34  | 94.73  | 95.26  | 94.56  |
| <b>ERK2/MAPK1</b>   | 89.35  | 88.25  | 92.54  | 91.58  | 89.78  | 87.49  |

|                    |        |        |        |        |        |        |
|--------------------|--------|--------|--------|--------|--------|--------|
| <b>ERK5/MAPK7</b>  | 99.60  | 98.66  | 96.51  | 92.77  | 100.55 | 98.01  |
| <b>ERK7/MAPK15</b> | 90.48  | 89.98  | 86.79  | 85.69  | 98.32  | 96.45  |
| <b>ERN1/IRE1</b>   | 98.26  | 96.56  | 92.80  | 92.47  | 90.99  | 90.44  |
| <b>ERN2/IRE2</b>   | 104.16 | 103.94 | 97.51  | 97.32  | 98.87  | 96.29  |
| <b>FAK/PTK2</b>    | 96.05  | 87.69  | 94.56  | 93.97  | 97.12  | 95.42  |
| <b>FER</b>         | 83.86  | 83.48  | 89.18  | 86.16  | 86.01  | 84.91  |
| <b>FES/FPS</b>     | 97.02  | 96.09  | 99.93  | 99.20  | 98.72  | 98.66  |
| <b>FGFR1</b>       | 101.69 | 101.63 | 97.43  | 96.52  | 101.12 | 99.91  |
| <b>FGFR2</b>       | 97.84  | 97.43  | 95.51  | 95.46  | 91.89  | 90.89  |
| <b>FGFR3</b>       | 104.85 | 104.10 | 101.07 | 100.98 | 102.79 | 102.08 |
| <b>FGFR4</b>       | 95.18  | 94.51  | 98.18  | 97.61  | 99.61  | 98.99  |
| <b>FGR</b>         | 93.41  | 91.32  | 83.07  | 74.69  | 89.43  | 86.35  |
| <b>FLT1/VEGFR1</b> | 98.17  | 95.86  | 107.26 | 105.29 | 107.93 | 104.04 |
| <b>FLT3</b>        | 90.68  | 85.34  | 77.06  | 76.15  | 84.31  | 81.48  |
| <b>FLT4/VEGFR3</b> | 96.83  | 96.06  | 98.40  | 97.81  | 97.06  | 96.61  |
| <b>FMS</b>         | 49.28  | 48.82  | 82.24  | 75.66  | 79.55  | 78.83  |
| <b>FRK/PTK5</b>    | 100.39 | 99.17  | 100.82 | 95.48  | 98.20  | 95.52  |
| <b>FYN</b>         | 121.72 | 119.07 | 99.86  | 97.69  | 97.01  | 96.30  |
| <b>GCK/MAP4K2</b>  | 68.25  | 67.48  | 61.77  | 59.95  | 75.44  | 74.91  |
| <b>GLK/MAP4K3</b>  | 83.93  | 83.55  | 88.42  | 88.16  | 90.29  | 88.71  |
| <b>GRK1</b>        | 95.38  | 93.08  | 94.01  | 93.15  | 95.27  | 94.01  |
| <b>GRK2</b>        | 106.03 | 105.76 | 105.04 | 103.58 | 100.58 | 99.17  |
| <b>GRK3</b>        | 97.93  | 96.85  | 94.39  | 94.07  | 96.12  | 95.20  |
| <b>GRK4</b>        | 91.85  | 90.10  | 80.43  | 79.15  | 97.14  | 92.15  |
| <b>GRK5</b>        | 99.91  | 97.81  | 103.50 | 99.06  | 93.13  | 91.62  |
| <b>GRK6</b>        | 104.08 | 103.22 | 108.53 | 107.43 | 97.07  | 94.12  |
| <b>GRK7</b>        | 100.81 | 100.06 | 95.12  | 93.81  | 91.79  | 91.35  |
| <b>GSK3a</b>       | 102.65 | 100.51 | 101.64 | 100.80 | 102.24 | 101.44 |
| <b>GSK3b</b>       | 99.45  | 96.28  | 88.53  | 84.98  | 88.84  | 88.83  |
| <b>Haspin</b>      | 84.75  | 83.53  | 83.33  | 82.77  | 84.79  | 82.31  |
| <b>HCK</b>         | 95.09  | 93.44  | 93.59  | 91.96  | 91.82  | 88.06  |
| <b>HGK/MAP4K4</b>  | 29.70  | 29.61  | 21.96  | 20.97  | 30.63  | 28.35  |
| <b>HIPK1</b>       | 100.16 | 99.62  | 106.43 | 102.36 | 99.91  | 96.64  |
| <b>HIPK2</b>       | 101.68 | 96.91  | 99.85  | 97.88  | 103.25 | 101.85 |
| <b>HIPK3</b>       | 87.90  | 85.10  | 97.83  | 97.73  | 90.44  | 89.08  |
| <b>HIPK4</b>       | 104.07 | 103.79 | 103.63 | 102.90 | 100.58 | 97.53  |
| <b>HPK1/MAP4K1</b> | 56.39  | 55.64  | 58.71  | 57.53  | 74.71  | 74.31  |
| <b>IGF1R</b>       | 100.72 | 99.60  | 99.22  | 98.31  | 96.08  | 94.80  |
| <b>IKKa/CHUK</b>   | 85.62  | 84.25  | 83.26  | 82.74  | 87.42  | 85.96  |

|                      |        |        |        |        |        |        |
|----------------------|--------|--------|--------|--------|--------|--------|
| <b>IKKb/IKBKB</b>    | 108.96 | 108.24 | 104.06 | 101.39 | 101.07 | 100.59 |
| <b>IKKe/IKBKE</b>    | 92.20  | 82.11  | 91.06  | 87.51  | 96.73  | 94.75  |
| <b>IR</b>            | 101.24 | 100.67 | 102.37 | 100.44 | 100.50 | 97.15  |
| <b>IRAK1</b>         | 100.81 | 100.16 | 102.79 | 101.36 | 98.92  | 97.90  |
| <b>IRAK4</b>         | 88.83  | 88.31  | 82.71  | 78.47  | 88.61  | 84.94  |
| <b>IRR/INSRR</b>     | 123.57 | 121.01 | 108.49 | 99.85  | 121.06 | 113.76 |
| <b>ITK</b>           | 99.45  | 95.85  | 105.57 | 103.48 | 102.11 | 100.51 |
| <b>JAK1</b>          | 96.67  | 96.26  | 102.44 | 99.53  | 101.38 | 99.07  |
| <b>JAK2</b>          | 95.80  | 92.56  | 93.48  | 92.09  | 88.59  | 88.17  |
| <b>JAK3</b>          | 102.64 | 101.59 | 106.09 | 102.92 | 100.59 | 99.31  |
| <b>JNK1</b>          | 86.44  | 83.52  | 90.64  | 88.65  | 86.86  | 85.74  |
| <b>JNK2</b>          | 91.34  | 90.94  | 93.42  | 91.99  | 94.72  | 94.14  |
| <b>JNK3</b>          | 98.83  | 95.11  | 96.38  | 93.66  | 104.05 | 100.92 |
| <b>KDR/VEGFR2</b>    | 97.27  | 95.43  | 95.86  | 92.99  | 88.36  | 85.59  |
| <b>KHS/MAP4K5</b>    | 42.81  | 39.41  | 39.69  | 39.28  | 41.74  | 40.60  |
| <b>KSR1</b>          | 93.57  | 92.67  | 94.48  | 93.83  | 96.28  | 95.91  |
| <b>KSR2</b>          | 97.23  | 96.38  | 96.92  | 93.25  | 98.52  | 97.71  |
| <b>LATS1</b>         | 101.28 | 99.48  | 97.36  | 97.31  | 102.26 | 100.53 |
| <b>LATS2</b>         | 110.37 | 109.35 | 105.71 | 104.67 | 101.91 | 100.36 |
| <b>LCK</b>           | 96.99  | 96.67  | 93.16  | 92.53  | 100.83 | 98.93  |
| <b>LCK2/ICK</b>      | 89.44  | 86.13  | 107.87 | 104.57 | 97.53  | 95.60  |
| <b>LIMK1</b>         | 77.94  | 76.31  | 65.09  | 64.18  | 74.16  | 72.63  |
| <b>LIMK2</b>         | 105.28 | 102.22 | 102.34 | 99.63  | 97.82  | 95.75  |
| <b>LKB1</b>          | 92.49  | 92.06  | 80.69  | 79.50  | 96.08  | 90.86  |
| <b>LOK/STK10</b>     | 61.59  | 61.54  | 51.83  | 51.51  | 68.66  | 68.53  |
| <b>LRRK2</b>         | 74.06  | 73.65  | 60.10  | 59.73  | 78.27  | 77.27  |
| <b>LYN</b>           | 84.03  | 82.25  | 79.87  | 79.23  | 91.04  | 88.67  |
| <b>LYN B</b>         | 95.08  | 91.23  | 99.25  | 96.56  | 98.25  | 97.80  |
| <b>MAK</b>           | 111.75 | 110.09 | 99.16  | 98.28  | 118.59 | 100.81 |
| <b>MAPKAPK2</b>      | 99.92  | 98.48  | 103.16 | 101.22 | 95.40  | 93.08  |
| <b>MAPKAPK3</b>      | 99.55  | 97.50  | 99.51  | 99.20  | 97.25  | 96.39  |
| <b>MAPKAPK5/PRAK</b> | 96.08  | 95.81  | 93.24  | 90.60  | 94.65  | 94.46  |
| <b>MARK1</b>         | 92.51  | 91.67  | 88.02  | 87.63  | 94.12  | 89.90  |
| <b>MARK2/PAR-1Ba</b> | 93.74  | 92.98  | 92.76  | 91.66  | 104.07 | 103.03 |
| <b>MARK3</b>         | 93.00  | 91.46  | 83.46  | 82.91  | 94.97  | 93.66  |
| <b>MARK4</b>         | 83.45  | 83.34  | 83.71  | 82.62  | 96.82  | 95.76  |
| <b>MAST3</b>         | 97.45  | 97.29  | 94.66  | 93.52  | 95.55  | 95.17  |
| <b>MASTL</b>         | 94.94  | 93.05  | 99.27  | 98.59  | 102.39 | 100.30 |
| <b>MEK1</b>          | 103.50 | 102.97 | 97.45  | 97.44  | 95.10  | 93.40  |

|                       |        |        |        |        |        |        |
|-----------------------|--------|--------|--------|--------|--------|--------|
| <b>MEK2</b>           | 91.30  | 89.42  | 87.11  | 85.87  | 93.98  | 91.58  |
| <b>MEK3</b>           | 104.87 | 103.04 | 102.24 | 100.94 | 101.41 | 101.33 |
| <b>MEK5</b>           | 96.31  | 93.44  | 86.86  | 85.95  | 93.15  | 92.97  |
| <b>MEKK1</b>          | 89.43  | 87.93  | 94.26  | 92.92  | 97.67  | 97.31  |
| <b>MEKK2</b>          | 82.92  | 81.13  | 95.51  | 95.02  | 100.62 | 98.82  |
| <b>MEKK3</b>          | 99.81  | 92.94  | 97.97  | 93.57  | 108.60 | 100.00 |
| <b>MEKK6</b>          | 95.17  | 89.86  | 98.28  | 96.75  | 95.93  | 95.16  |
| <b>MELK</b>           | 99.63  | 97.92  | 99.24  | 98.82  | 99.44  | 99.30  |
| <b>MINK/MINK1</b>     | 37.11  | 36.56  | 24.06  | 22.65  | 30.16  | 29.65  |
| <b>MKK4</b>           | 94.33  | 94.30  | 101.22 | 98.66  | 94.64  | 93.94  |
| <b>MKK6</b>           | 68.55  | 64.71  | 84.36  | 80.71  | 79.73  | 79.33  |
| <b>MKK7</b>           | 100.41 | 98.52  | 93.05  | 92.71  | 98.71  | 97.52  |
| <b>MLCK/MYLK</b>      | 106.35 | 106.15 | 106.34 | 106.15 | 103.44 | 101.49 |
| <b>MLCK2/MYLK2</b>    | 82.26  | 81.15  | 66.82  | 66.59  | 84.82  | 82.74  |
| <b>MLK1/MAP3K9</b>    | 103.62 | 102.91 | 111.75 | 110.44 | 99.78  | 98.95  |
| <b>MLK2/MAP3K10</b>   | 115.37 | 106.44 | 86.36  | 86.29  | 98.53  | 96.07  |
| <b>MLK3/MAP3K11</b>   | 106.15 | 101.95 | 99.36  | 99.32  | 96.73  | 96.66  |
| <b>MLK4</b>           | 91.19  | 89.41  | 95.27  | 95.21  | 96.15  | 93.38  |
| <b>MNK1</b>           | 60.95  | 59.43  | 51.11  | 50.34  | 71.38  | 70.81  |
| <b>MNK2</b>           | 68.96  | 63.87  | 48.23  | 46.54  | 70.76  | 68.28  |
| <b>MRCKa/CDC42BPA</b> | 104.45 | 102.98 | 102.59 | 102.07 | 105.33 | 104.72 |
| <b>MRCKb/CDC42BPB</b> | 97.02  | 95.88  | 94.59  | 94.42  | 99.74  | 99.47  |
| <b>MSK1/RPS6KA5</b>   | 99.70  | 96.47  | 87.13  | 82.15  | 90.51  | 89.44  |
| <b>MSK2/RPS6KA4</b>   | 96.00  | 95.45  | 97.14  | 96.56  | 95.42  | 92.01  |
| <b>MSSK1/STK23</b>    | 98.18  | 91.96  | 99.31  | 98.71  | 99.84  | 99.23  |
| <b>MST1/STK4</b>      | 100.28 | 99.22  | 101.34 | 100.26 | 103.09 | 101.65 |
| <b>MST2/STK3</b>      | 98.35  | 93.52  | 95.63  | 93.91  | 101.75 | 100.46 |
| <b>MST3/STK24</b>     | 113.21 | 107.63 | 90.20  | 87.91  | 96.29  | 94.57  |
| <b>MST4</b>           | 90.69  | 90.53  | 86.90  | 85.32  | 94.97  | 90.97  |
| <b>MUSK</b>           | 90.30  | 88.04  | 92.79  | 91.48  | 92.16  | 90.22  |
| <b>MYLK3</b>          | 102.98 | 101.18 | 99.83  | 98.90  | 100.08 | 99.34  |
| <b>MYLK4</b>          | 95.87  | 95.46  | 97.68  | 95.79  | 103.63 | 102.67 |
| <b>MYO3A</b>          | 99.37  | 95.48  | 84.03  | 81.86  | 94.74  | 94.68  |
| <b>MYO3b</b>          | 84.96  | 84.87  | 81.60  | 81.31  | 86.55  | 85.13  |
| <b>NEK1</b>           | 100.04 | 93.20  | 87.56  | 84.54  | 88.09  | 84.46  |
| <b>NEK11</b>          | 92.05  | 89.23  | 90.59  | 85.69  | 91.90  | 87.79  |
| <b>NEK2</b>           | 93.02  | 91.46  | 92.28  | 90.39  | 98.45  | 96.23  |
| <b>NEK3</b>           | 96.09  | 95.23  | 88.26  | 86.84  | 96.16  | 94.54  |
| <b>NEK4</b>           | 100.85 | 99.62  | 98.49  | 97.67  | 98.05  | 97.25  |



|                         |        |        |        |        |        |        |
|-------------------------|--------|--------|--------|--------|--------|--------|
| <b>NEK5</b>             | 105.78 | 96.39  | 98.71  | 97.51  | 93.22  | 93.10  |
| <b>NEK6</b>             | 100.84 | 100.11 | 99.26  | 98.81  | 103.64 | 103.36 |
| <b>NEK7</b>             | 96.75  | 93.87  | 97.56  | 96.68  | 97.42  | 97.32  |
| <b>NEK8</b>             | 101.75 | 100.17 | 98.40  | 98.06  | 109.21 | 106.54 |
| <b>NEK9</b>             | 87.78  | 82.66  | 91.72  | 91.25  | 93.51  | 91.59  |
| <b>NIM1</b>             | 94.49  | 93.25  | 96.64  | 95.18  | 98.15  | 97.81  |
| <b>NLK</b>              | 44.71  | 44.67  | 21.99  | 20.81  | 50.44  | 47.74  |
| <b>OSR1/OXSR1</b>       | 96.08  | 95.05  | 93.41  | 93.34  | 94.97  | 94.75  |
| <b>P38a/MAPK14</b>      | 99.75  | 99.05  | 92.73  | 91.67  | 97.01  | 96.02  |
| <b>P38b/MAPK11</b>      | 101.90 | 99.99  | 92.29  | 92.20  | 95.54  | 95.51  |
| <b>P38d/MAPK13</b>      | 103.50 | 101.10 | 100.64 | 98.26  | 97.65  | 97.52  |
| <b>P38g</b>             | 94.38  | 90.04  | 109.56 | 107.36 | 107.64 | 105.83 |
| <b>p70S6K/RPS6KB1</b>   | 97.82  | 94.87  | 97.80  | 96.69  | 100.22 | 99.76  |
| <b>p70S6Kb/RPS6KB2</b>  | 102.82 | 98.03  | 97.27  | 97.21  | 101.90 | 99.09  |
| <b>PAK1</b>             | 103.65 | 103.63 | 104.85 | 102.29 | 103.23 | 100.98 |
| <b>PAK2</b>             | 106.75 | 104.17 | 100.73 | 100.35 | 104.48 | 103.95 |
| <b>PAK3</b>             | 90.17  | 89.47  | 89.45  | 87.14  | 124.51 | 124.21 |
| <b>PAK4</b>             | 103.71 | 103.30 | 98.47  | 98.21  | 99.91  | 98.82  |
| <b>PAK5</b>             | 96.74  | 96.36  | 94.56  | 92.74  | 97.29  | 94.99  |
| <b>PAK6</b>             | 98.78  | 98.70  | 102.00 | 97.22  | 96.32  | 95.67  |
| <b>PASK</b>             | 90.71  | 89.01  | 93.95  | 93.23  | 99.15  | 98.21  |
| <b>PBK/TOPK</b>         | 95.05  | 94.31  | 91.79  | 89.81  | 102.69 | 102.56 |
| <b>PDGFRa</b>           | 80.05  | 79.03  | 82.87  | 81.22  | 81.89  | 81.08  |
| <b>PDGFRb</b>           | 90.14  | 88.87  | 77.30  | 76.01  | 92.12  | 89.56  |
| <b>PDK1/PDPK1</b>       | 96.26  | 93.89  | 94.32  | 91.49  | 95.91  | 94.36  |
| <b>PEAK1</b>            | 112.02 | 110.20 | 99.07  | 97.59  | 96.57  | 95.56  |
| <b>PHKg1</b>            | 96.68  | 92.81  | 85.63  | 82.79  | 96.97  | 95.24  |
| <b>PHKg2</b>            | 95.85  | 95.06  | 94.94  | 93.32  | 96.68  | 96.43  |
| <b>PIM1</b>             | 105.63 | 103.63 | 100.02 | 97.92  | 95.25  | 92.25  |
| <b>PIM2</b>             | 98.05  | 96.36  | 99.17  | 95.51  | 99.70  | 98.82  |
| <b>PIM3</b>             | 107.18 | 106.04 | 100.03 | 99.10  | 107.12 | 106.19 |
| <b>PKA</b>              | 97.99  | 97.30  | 97.90  | 96.94  | 96.87  | 95.62  |
| <b>PKAc<sub>b</sub></b> | 99.42  | 98.30  | 96.17  | 95.19  | 97.92  | 96.20  |
| <b>PKAc<sub>g</sub></b> | 91.97  | 88.31  | 94.08  | 93.99  | 100.89 | 98.97  |
| <b>PKCa</b>             | 88.30  | 85.60  | 89.76  | 89.62  | 90.26  | 89.76  |
| <b>PKCb<sub>1</sub></b> | 87.68  | 86.84  | 85.45  | 82.63  | 85.35  | 83.58  |
| <b>PKCb<sub>2</sub></b> | 104.64 | 103.20 | 106.80 | 106.51 | 99.11  | 97.56  |
| <b>PKCd</b>             | 93.40  | 92.22  | 98.99  | 97.72  | 101.05 | 100.12 |
| <b>PKCepsilon</b>       | 97.83  | 97.53  | 99.77  | 96.64  | 106.14 | 105.76 |

|                    |        |        |        |        |        |        |
|--------------------|--------|--------|--------|--------|--------|--------|
| <b>PKCeta</b>      | 96.80  | 96.60  | 94.91  | 93.90  | 98.29  | 98.10  |
| <b>PKCg</b>        | 98.34  | 97.90  | 97.01  | 96.27  | 97.16  | 96.41  |
| <b>PKCiota</b>     | 100.39 | 95.18  | 107.22 | 100.36 | 99.14  | 98.91  |
| <b>PKCmu/PRKD1</b> | 93.33  | 90.68  | 90.08  | 88.26  | 97.61  | 95.09  |
| <b>PKCnu/PRKD3</b> | 144.24 | 142.24 | 83.26  | 82.18  | 89.59  | 89.04  |
| <b>PKCtheta</b>    | 102.63 | 95.99  | 85.06  | 81.31  | 87.00  | 84.96  |
| <b>PKCzeta</b>     | 92.41  | 91.33  | 91.17  | 90.40  | 92.51  | 91.43  |
| <b>PKD2/PRKD2</b>  | 105.17 | 102.86 | 96.07  | 95.72  | 99.15  | 98.89  |
| <b>PKG1a</b>       | 103.94 | 103.73 | 97.90  | 97.81  | 101.80 | 101.45 |
| <b>PKG1b</b>       | 99.52  | 98.95  | 101.57 | 98.83  | 98.81  | 96.31  |
| <b>PKG2/PRKG2</b>  | 95.65  | 91.81  | 98.88  | 97.48  | 98.49  | 97.08  |
| <b>PKMYT1</b>      | 124.81 | 121.94 | 101.28 | 100.09 | 94.46  | 92.38  |
| <b>PKN1/PRK1</b>   | 94.64  | 94.01  | 98.54  | 96.76  | 98.68  | 96.39  |
| <b>PKN2/PRK2</b>   | 102.96 | 100.36 | 94.53  | 91.84  | 95.93  | 95.77  |
| <b>PKN3/PRK3</b>   | 100.61 | 98.77  | 95.02  | 93.55  | 98.38  | 96.44  |
| <b>PLK1</b>        | 98.82  | 97.79  | 92.38  | 91.24  | 92.72  | 92.70  |
| <b>PLK2</b>        | 93.59  | 92.87  | 98.76  | 97.24  | 102.70 | 102.38 |
| <b>PLK3</b>        | 96.05  | 93.88  | 94.99  | 93.70  | 97.67  | 94.47  |
| <b>PLK4/SAK</b>    | 94.00  | 93.89  | 94.12  | 93.32  | 98.82  | 98.79  |
| <b>PRKX</b>        | 96.97  | 96.87  | 99.94  | 99.24  | 91.29  | 90.55  |
| <b>PYK2</b>        | 83.76  | 81.78  | 85.92  | 85.65  | 88.59  | 85.73  |
| <b>RAF1</b>        | 85.03  | 84.08  | 78.66  | 78.57  | 85.46  | 83.85  |
| <b>RET</b>         | 92.55  | 89.18  | 94.44  | 94.34  | 96.01  | 93.64  |
| <b>RIPK2</b>       | 80.92  | 79.92  | 71.12  | 66.31  | 89.66  | 89.10  |
| <b>RIPK3</b>       | 112.17 | 111.71 | 106.23 | 101.40 | 103.87 | 102.83 |
| <b>RIPK4</b>       | 79.68  | 77.02  | 75.50  | 70.28  | 86.09  | 82.04  |
| <b>RIPK5</b>       | 84.75  | 83.86  | 83.14  | 82.21  | 86.85  | 86.47  |
| <b>ROCK1</b>       | 96.97  | 96.20  | 94.95  | 91.98  | 94.71  | 92.61  |
| <b>ROCK2</b>       | 121.91 | 119.86 | 115.65 | 115.13 | 100.51 | 93.98  |
| <b>RON/MST1R</b>   | 113.67 | 108.77 | 98.74  | 97.00  | 105.33 | 104.29 |
| <b>ROS/ROS1</b>    | 95.56  | 95.52  | 87.73  | 86.47  | 97.39  | 95.54  |
| <b>RSK1</b>        | 97.01  | 95.84  | 98.93  | 97.99  | 101.97 | 101.00 |
| <b>RSK2</b>        | 97.43  | 97.24  | 100.90 | 99.92  | 102.57 | 101.06 |
| <b>RSK3</b>        | 101.40 | 99.21  | 92.16  | 87.93  | 101.35 | 99.74  |
| <b>RSK4</b>        | 97.30  | 94.31  | 95.95  | 95.64  | 95.46  | 94.61  |
| <b>SBK1</b>        | 96.31  | 96.20  | 94.60  | 93.74  | 103.20 | 101.08 |
| <b>SGK1</b>        | 91.09  | 90.95  | 94.93  | 93.48  | 98.75  | 95.22  |
| <b>SGK2</b>        | 95.78  | 94.93  | 102.03 | 100.43 | 102.54 | 100.91 |
| <b>SGK3/SGKL</b>   | 86.00  | 83.45  | 102.87 | 99.35  | 94.81  | 93.33  |

|                     |        |        |        |        |        |        |
|---------------------|--------|--------|--------|--------|--------|--------|
| <b>SIK1</b>         | 88.51  | 87.47  | 82.87  | 82.71  | 93.76  | 91.60  |
| <b>SIK2</b>         | 36.68  | 35.99  | 31.97  | 30.68  | 43.90  | 43.50  |
| <b>SIK3</b>         | 72.61  | 71.66  | 59.47  | 58.19  | 88.98  | 82.93  |
| <b>SLK/STK2</b>     | 105.63 | 104.60 | 100.24 | 96.16  | 100.70 | 100.64 |
| <b>SNARK/NUAK2</b>  | 93.54  | 92.65  | 93.71  | 91.64  | 94.38  | 93.96  |
| <b>SNRK</b>         | 113.18 | 107.97 | 105.10 | 104.94 | 100.30 | 97.75  |
| <b>SRMS</b>         | 98.82  | 97.08  | 96.58  | 95.09  | 96.08  | 95.91  |
| <b>SRPK1</b>        | 104.82 | 102.86 | 111.76 | 105.40 | 89.32  | 81.70  |
| <b>SRPK2</b>        | 97.17  | 95.75  | 97.75  | 94.13  | 121.46 | 115.95 |
| <b>SSTK/TSSK6</b>   | 110.28 | 107.83 | 110.04 | 107.86 | 98.18  | 98.04  |
| <b>STK16</b>        | 102.11 | 99.20  | 106.91 | 103.69 | 100.72 | 99.45  |
| <b>STK21/CIT</b>    | 102.54 | 99.05  | 88.76  | 84.42  | 89.07  | 84.97  |
| <b>STK22D/TSSK1</b> | 101.05 | 99.56  | 97.48  | 97.01  | 100.64 | 99.16  |
| <b>STK25/YSK1</b>   | 92.82  | 91.63  | 95.70  | 94.98  | 96.14  | 94.06  |
| <b>STK32B/YANK2</b> | 86.51  | 82.92  | 87.61  | 87.20  | 98.22  | 94.20  |
| <b>STK32C/YANK3</b> | 92.80  | 90.70  | 86.77  | 85.01  | 93.31  | 91.96  |
| <b>STK33</b>        | 97.29  | 96.42  | 91.03  | 88.77  | 97.37  | 96.94  |
| <b>STK38/NDR1</b>   | 91.48  | 88.77  | 91.87  | 90.38  | 96.68  | 93.15  |
| <b>STK38L/NDR2</b>  | 95.32  | 93.58  | 99.37  | 98.69  | 103.76 | 102.97 |
| <b>STK39/STLK3</b>  | 97.61  | 94.07  | 89.10  | 88.76  | 95.70  | 93.62  |
| <b>SYK</b>          | 104.83 | 99.79  | 101.32 | 100.12 | 101.79 | 101.24 |
| <b>TAK1</b>         | 98.69  | 97.41  | 98.52  | 97.44  | 99.08  | 98.46  |
| <b>TAOK1</b>        | 38.45  | 36.37  | 60.28  | 60.19  | 62.19  | 60.59  |
| <b>TAOK2/TAO1</b>   | 82.27  | 81.16  | 88.57  | 87.58  | 100.90 | 99.37  |
| <b>TAOK3/JIK</b>    | 68.90  | 65.47  | 69.70  | 69.26  | 84.52  | 81.51  |
| <b>TBK1</b>         | 87.00  | 83.46  | 93.61  | 92.56  | 87.18  | 85.62  |
| <b>TEC</b>          | 127.66 | 124.33 | 107.92 | 107.42 | 106.34 | 106.19 |
| <b>TESK1</b>        | 108.31 | 108.28 | 113.76 | 108.88 | 105.36 | 105.23 |
| <b>TESK2</b>        | 93.29  | 93.23  | 93.94  | 93.89  | 92.15  | 92.03  |
| <b>TGFBR2</b>       | 111.40 | 110.01 | 102.91 | 97.44  | 105.82 | 105.33 |
| <b>TIE2/TEK</b>     | 93.07  | 91.97  | 93.84  | 92.85  | 93.36  | 92.15  |
| <b>TLK1</b>         | 111.42 | 109.03 | 108.27 | 107.91 | 103.74 | 100.84 |
| <b>TLK2</b>         | 95.15  | 94.99  | 96.63  | 95.61  | 93.27  | 89.84  |
| <b>TNIK</b>         | 5.27   | 4.57   | -0.77  | -2.62  | 4.85   | 3.92   |
| <b>TNK1</b>         | 108.03 | 102.51 | 105.47 | 99.53  | 98.56  | 98.22  |
| <b>TRKA</b>         | 91.94  | 89.07  | 91.84  | 90.11  | 95.24  | 94.00  |
| <b>TRKB</b>         | 109.41 | 105.99 | 100.49 | 99.94  | 98.97  | 98.44  |
| <b>TRKC</b>         | 118.59 | 117.99 | 102.66 | 101.44 | 99.02  | 97.50  |
| <b>TSSK2</b>        | 107.44 | 102.75 | 100.20 | 98.77  | 100.08 | 99.71  |

|                     |        |        |        |        |        |        |
|---------------------|--------|--------|--------|--------|--------|--------|
| <b>TSSK3/STK22C</b> | 95.08  | 94.89  | 96.57  | 96.02  | 96.56  | 95.64  |
| <b>TTBK1</b>        | 96.89  | 93.79  | 97.29  | 96.78  | 99.41  | 98.52  |
| <b>TTBK2</b>        | 97.99  | 94.77  | 97.12  | 94.62  | 97.80  | 96.48  |
| <b>TXK</b>          | 103.85 | 100.24 | 101.32 | 100.80 | 98.23  | 95.85  |
| <b>TYK1/LTK</b>     | 100.49 | 99.87  | 99.76  | 99.01  | 99.99  | 99.29  |
| <b>TYK2</b>         | 103.25 | 100.78 | 92.64  | 91.37  | 102.60 | 99.47  |
| <b>TYRO3/SKY</b>    | 97.39  | 95.17  | 84.13  | 83.48  | 94.52  | 93.66  |
| <b>ULK1</b>         | 86.28  | 82.29  | 84.69  | 83.53  | 89.77  | 89.24  |
| <b>ULK2</b>         | 81.06  | 80.11  | 73.70  | 73.24  | 85.24  | 84.46  |
| <b>ULK3</b>         | 94.55  | 93.28  | 91.50  | 91.23  | 98.85  | 97.24  |
| <b>VRK1</b>         | 108.53 | 108.29 | 104.27 | 100.69 | 101.56 | 98.74  |
| <b>VRK2</b>         | 88.02  | 85.61  | 89.06  | 87.47  | 92.46  | 89.63  |
| <b>WEE1</b>         | 128.65 | 120.95 | 104.70 | 104.15 | 104.62 | 99.73  |
| <b>WNK1</b>         | 101.95 | 100.13 | 107.57 | 107.33 | 104.49 | 102.29 |
| <b>WNK2</b>         | 98.86  | 98.34  | 95.45  | 95.09  | 96.93  | 93.64  |
| <b>WNK3</b>         | 92.11  | 90.95  | 89.56  | 88.15  | 93.78  | 92.59  |
| <b>YES/YES1</b>     | 100.50 | 98.27  | 104.81 | 104.56 | 109.01 | 108.87 |
| <b>YSK4/MAP3K19</b> | 105.08 | 101.54 | 98.16  | 97.39  | 97.00  | 96.61  |
| <b>ZAK/MLTK</b>     | 38.53  | 36.39  | 31.26  | 30.86  | 46.64  | 46.59  |
| <b>ZAP70</b>        | 99.62  | 98.79  | 96.23  | 94.79  | 98.70  | 98.47  |
| <b>ZIPK/DAPK3</b>   | 108.04 | 105.01 | 103.90 | 103.31 | 103.72 | 102.34 |
